# Supplementary material for: The Internal Conduit System of the Swine Inverted Lymph Node
Source: Frontiers journal article supplement (doi:10.3389/fimmu.2022.869384), 2022-06-06
Supplement: Data_Sheet_1.PDF [file Data_Sheet_1.PDF]

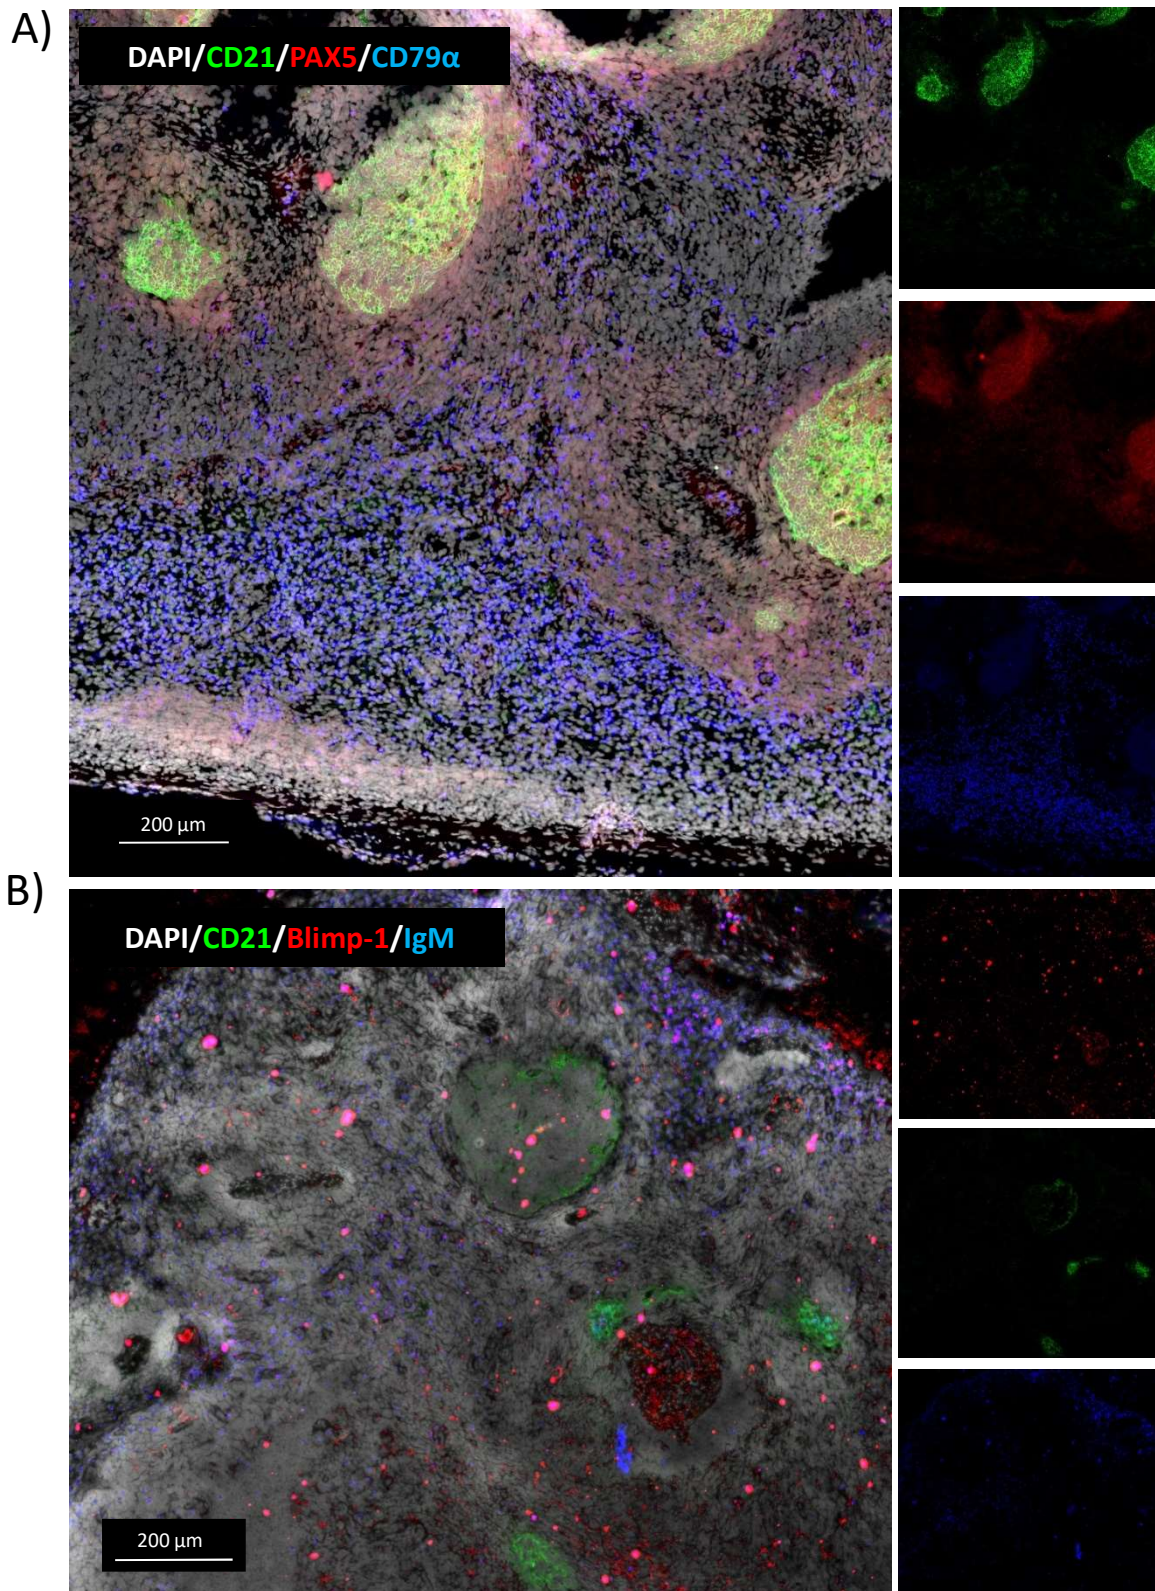

Supp Fig. 1: T cell zones are occupied by naïve, Pax5+ B cells whereas efferent area are occupied by mature, Blimp-1+ B cells. These slices were used for Figure 6 B) and C) Pax5 and Blimp-1 expressions on respectively CD21 or CD79α positive B cells and CD21 or IgM positive B cells .
